# Supplementary material for: Natural Zeolites for the Sorption of Ammonium: Breakthrough Curve Evaluation and Modeling
Source: MDPI journal article supplement (doi:10.3390/molecules28041614), 2023-02-07
Supplement: s1 [file s1]

# Natural Zeolites for the Sorption of Ammonium: Breakthrough Curve Evaluation and Modeling

Stephan Eberle, Viktor Schmalz, Hilmar Börnick and Stefan Stolte \*

Institute of Water Chemistry, Technische Universität Dresden, 01062 Dresden, Germany

\* Correspondence: stefan.stolte@tu-dresden.de; Tel.: +49-(0)351-463-32759

## Supporting Information

### S1 Isothermal Data

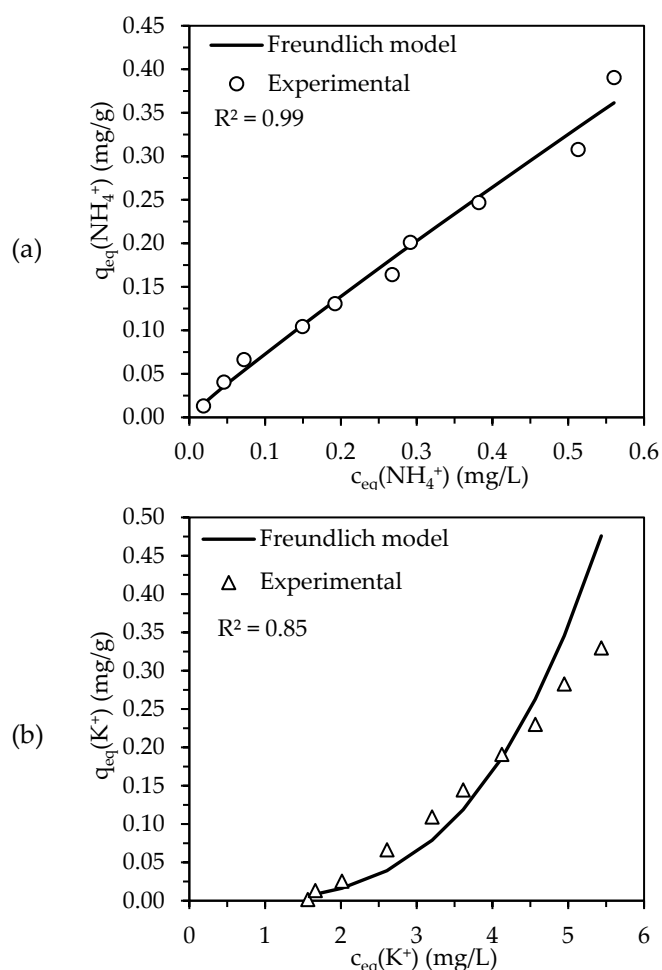

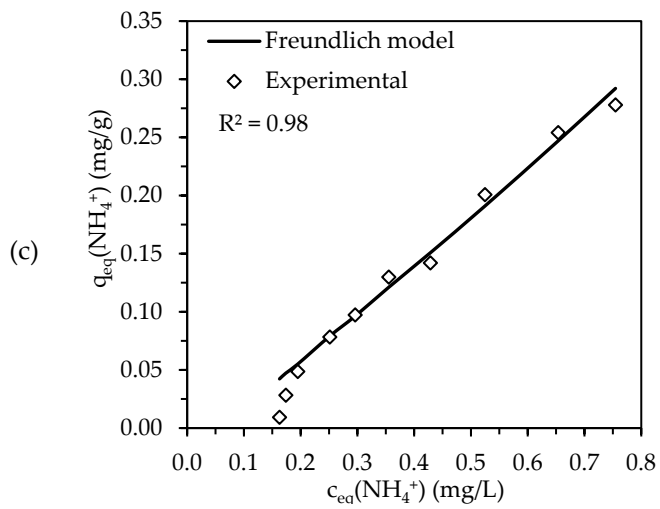

**Figure S1.** Experimental and Freundlich model isotherms (matrix: ultrapure water;  $t_{eq}$ : 21 d;  $pH_0$ : 5.5–6.2; **(a)**:  $c_0(NH_4^+) = 0.06$ –2.22 mmol/L; **(b)**:  $c_0(K^+) = 0.03$ –1.02 mmol/L; **(c)**  $c_0(NH_4^+) = 0.06$ –2.22 mmol/L,  $c_0(K^+) = 0.7$  mmol/L;  $w/v = 100$  g<sub>z</sub>/L,  $T = 22$  °C; grain size: 0.5–0.8 mm;  $n = 2$ ).

## S2 Kinetic Data

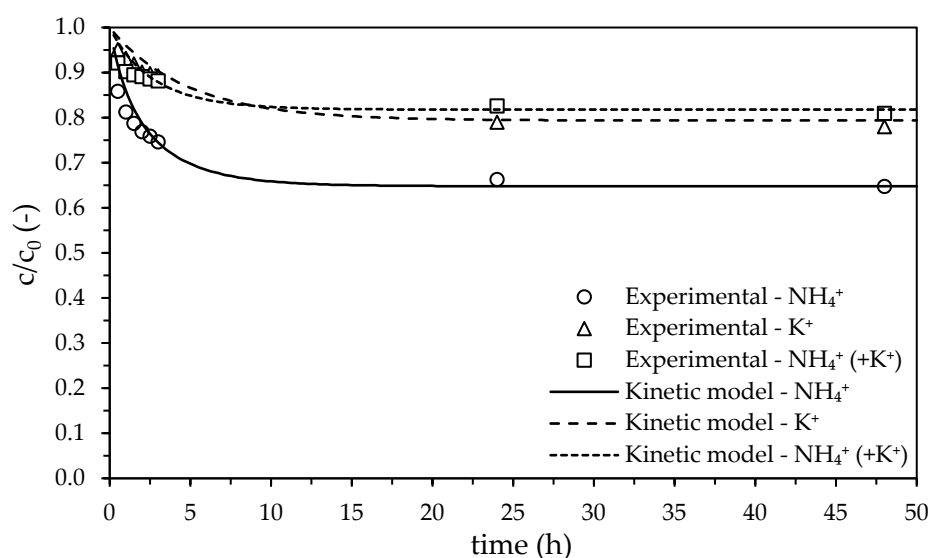

**Figure S2.** Experimental and modeled kinetic data (matrix: ultrapure water;  $t_{eq}$ : 48 h;  $pH_0$ : 5.5–6.2; ( $c_0(NH_4^+) = 0.7$  mmol/L,  $c_0(K^+) = 0.7$  mmol/L,  $c_0(NH_4^+, K^+) = 0.7$  mmol/L;  $w/v = 0.7$  g/L,  $T = 22$  °C; grain size: 0.5–0.8 mm;  $n = 2$ ).

## S3 Thomas Model Evaluation in Ultrapure Water

**Table S1.** Determined Thomas model constants (matrix: ultrapure water).

| Water matrix            | Thomas model constants |                  |                 |       |
|-------------------------|------------------------|------------------|-----------------|-------|
|                         | $k_{Th}$ (L/h*mg)      | $a$ (mg/g)       | $b$             | $R^2$ |
| 0.7 mmol/L $NH_4^+$     | $1.44 \pm 9.73$        | $2.24 \pm 15$    | $0.12 \pm 0.83$ | 0.98  |
| 0.7 mmol/L $K^+$        | $0.015 \pm 0.62$       | $92.76 \pm 3723$ | $6.42 \pm 258$  | 0.95  |
| 0.7 mmol/L $NH_4^+/K^+$ | $0.25 \pm 1.76$        | $13.04 \pm 92$   | $1.56 \pm 11$   | 0.99  |

## S4 Influence of Natural Water Matrices

**Table S2.** General information to the investigated natural water matrices.

| Water matrices | EC <sup>x</sup><br>( $\mu S/cm$ ) | Sample description |                                                                            |
|----------------|-----------------------------------|--------------------|----------------------------------------------------------------------------|
| Groundwater    | $560 \pm 2.8$                     | Date of sampling:  | 14.10.2022                                                                 |
|                |                                   | Sampling Location: | Sampling in 70 m distance to the Elbe river<br>(50°57'56.6"N 13°55'25.5"E) |
|                |                                   | Characteristics:   | pH: 7.6; T = 14 °C                                                         |
|                |                                   | Autoclaved:        | 25 min at 121 °C                                                           |
| Elbe water     | $462 \pm 1.7$                     | Date of sampling:  | 09.09.2022                                                                 |
|                |                                   | Sampling Location: | Elbe river in Dresden near the bank<br>(51°04'19.0"N 13°43'21.1"E)         |
|                |                                   | Characteristics:   | pH: 7.8; T = 17 °C                                                         |
|                |                                   | Autoclaved:        | 25 min at 121 °C                                                           |

<sup>x</sup> electrical conductivity

**Table S3.** Determined Thomas model constants (matrix: natural water).

| Water matrix           | Thomas model constants |                 |                  |       |
|------------------------|------------------------|-----------------|------------------|-------|
|                        | $k_{Th}$ (L/h*mg)      | a (mg/g)        | b                | $R^2$ |
| Tap water              | $0.04 \pm 0.81$        | $48.57 \pm 946$ | $3.22 \pm 63.02$ | 0.97  |
| Elbe-/tap water (1:10) | $0.15 \pm 3.19$        | $13.86 \pm 293$ | $1.03 \pm 22.03$ | 0.96  |
| Groundwater            | $0.33 \pm 10.48$       | $6.14 \pm 191$  | $0.74 \pm 23.19$ | 0.94  |
| Elbe river water       | $0.58 \pm 16.62$       | $3.35 \pm 96$   | $0.53 \pm 15.41$ | 0.96  |

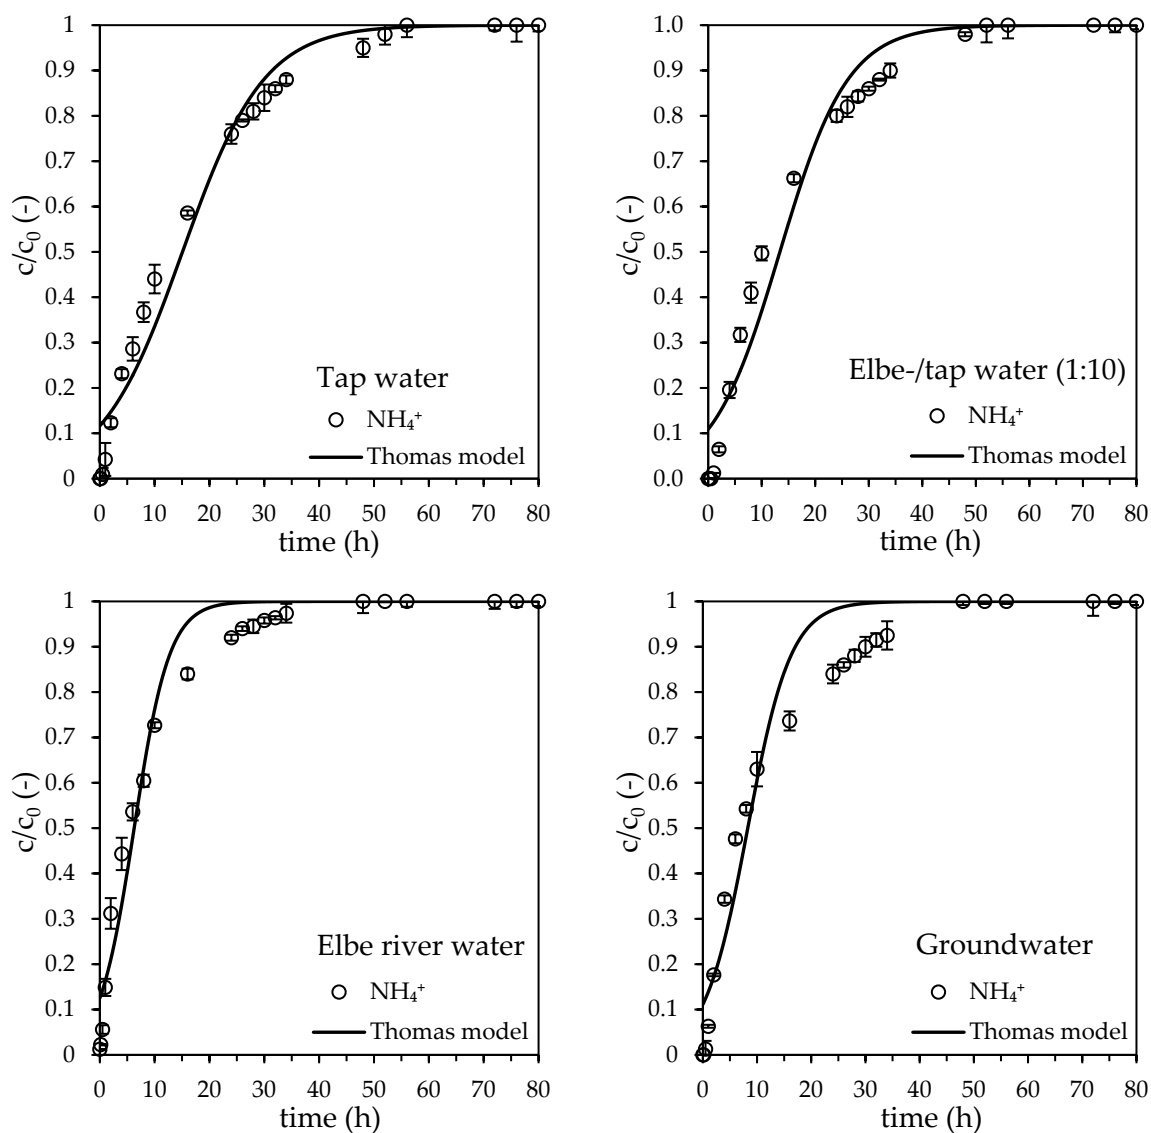**Figure S3:** Experimental  $NH_4^+$  breakthrough curves and modeling using the Thomas model.
